# Supplementary material for: Arkadia/RNF111 is a SUMO-targeted ubiquitin ligase with preference for substrates marked with SUMO1-capped SUMO2/3 chain
Source: PubMed Central journal article supplement (PMC6695498; doi:10.1038/s41467-019-11549-3), 2019-08-15
Supplement: 41467_2019_11549_MOESM1_ESM.pdf [file 41467_2019_11549_MOESM1_ESM.pdf]

## **SUPPLEMENTARY INFORMATION**

**Arkadia/RNF111 is a SUMO-targeted ubiquitin ligase with preference for substrates marked with SUMO1-capped SUMO2/3 chain**

**Sriramachandran et al.**

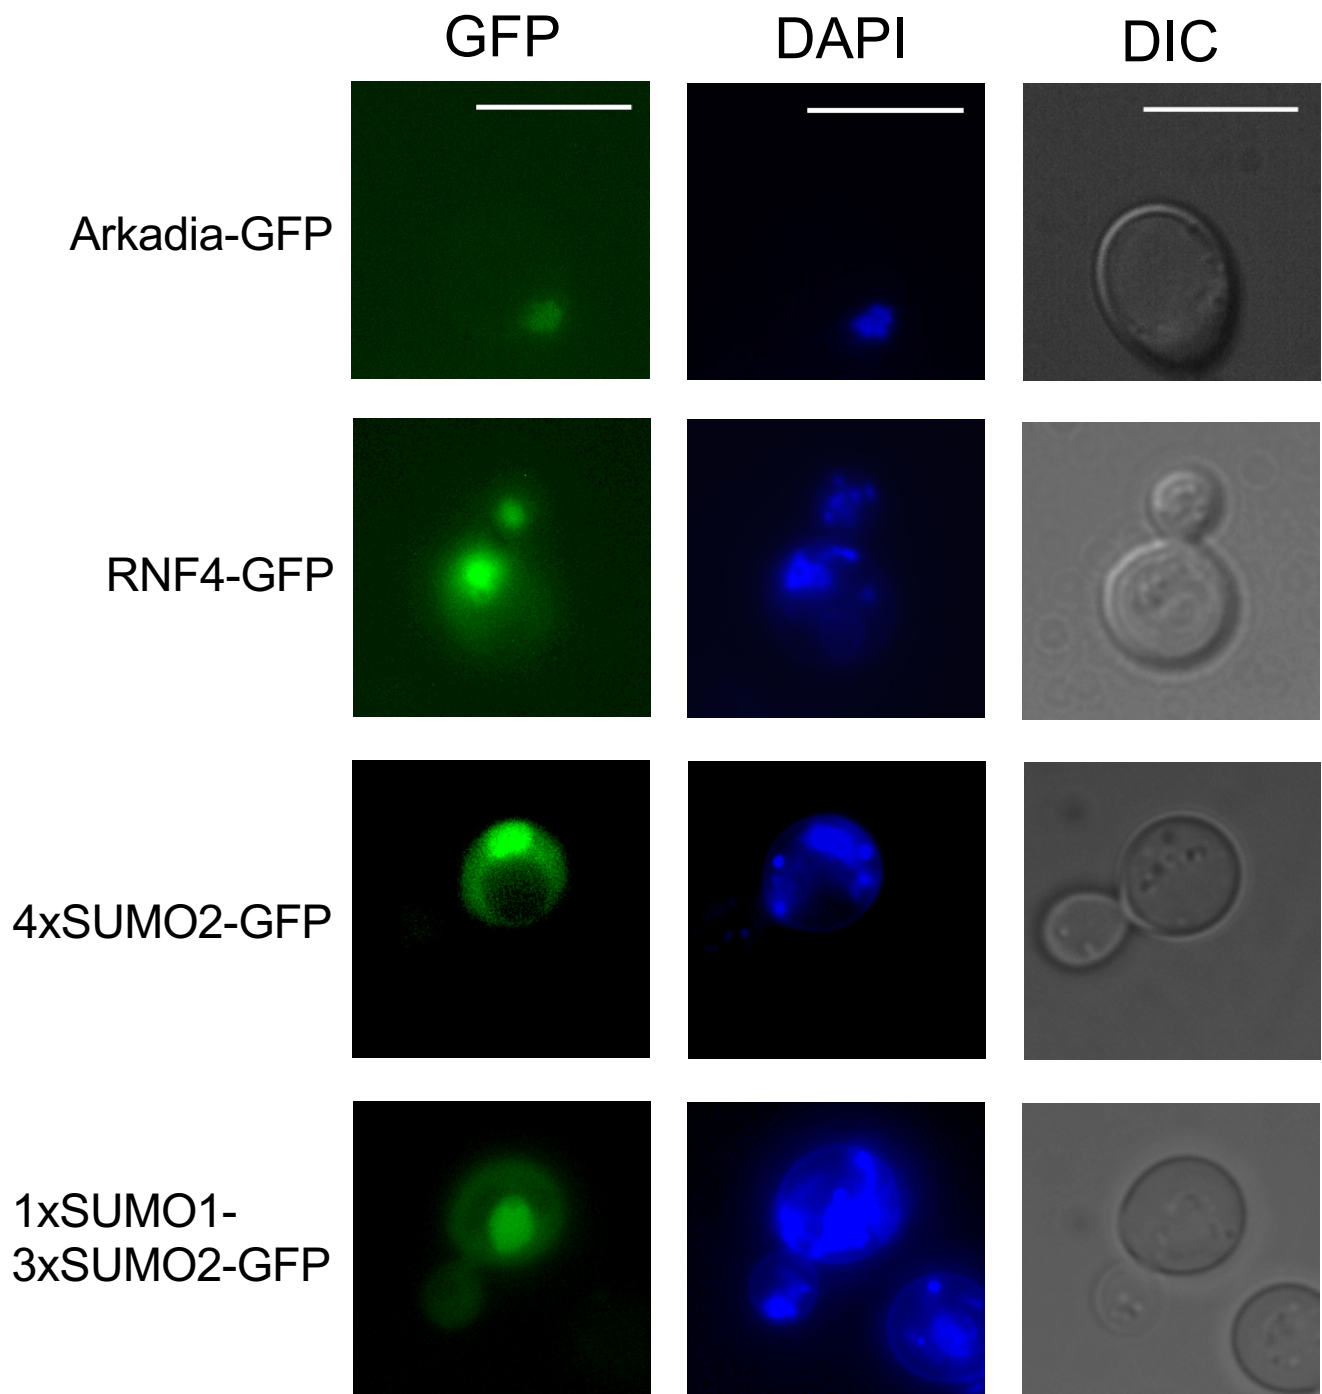

**Supplementary Fig. 1**

**Localization of STUbLs and model substrates in yeast.** *S. cerevisiae* cells were transformed with plasmids expressing the indicated GFP fusion proteins and analyzed by fluorescence and differential interference contrast (DIC) microscopy after staining with 4',6-diamidino-2-phenylindole (DAPI). Because of relatively low abundance, Arkadia-GFP was expressed in *uba1-ts26* cells, which are deficient in ubiquitin-dependent proteolysis due to a defect in ubiquitin-activating enzyme. The other constructs were expressed in wild-type cells. Scale bar, 10  $\mu$ m.

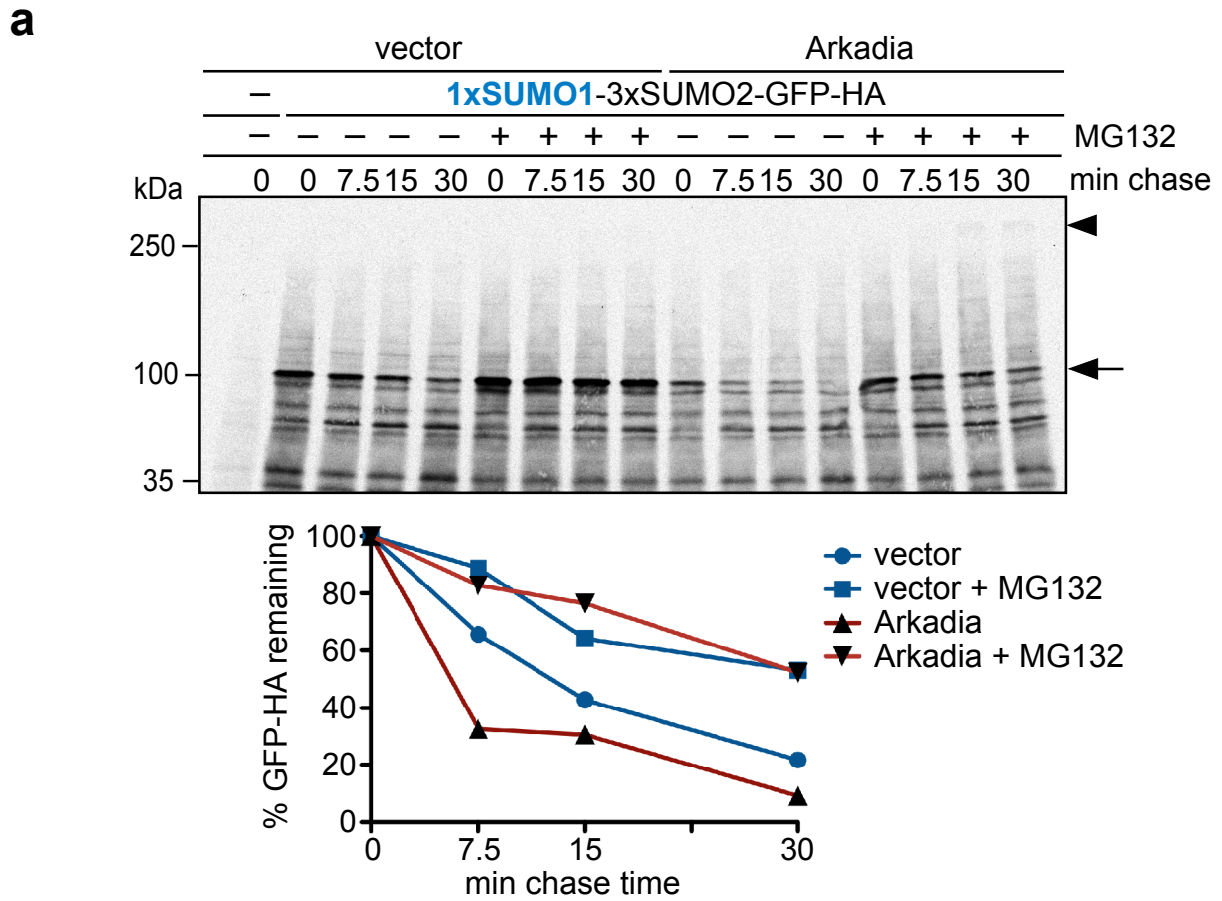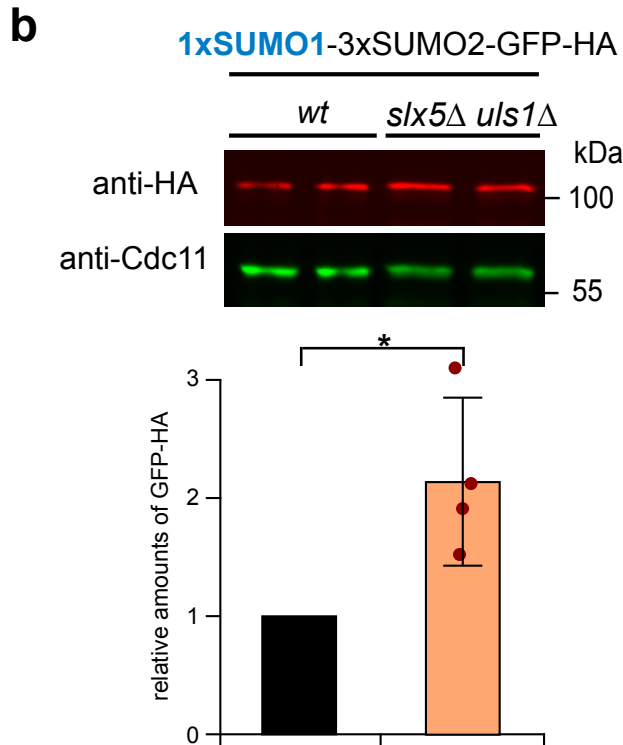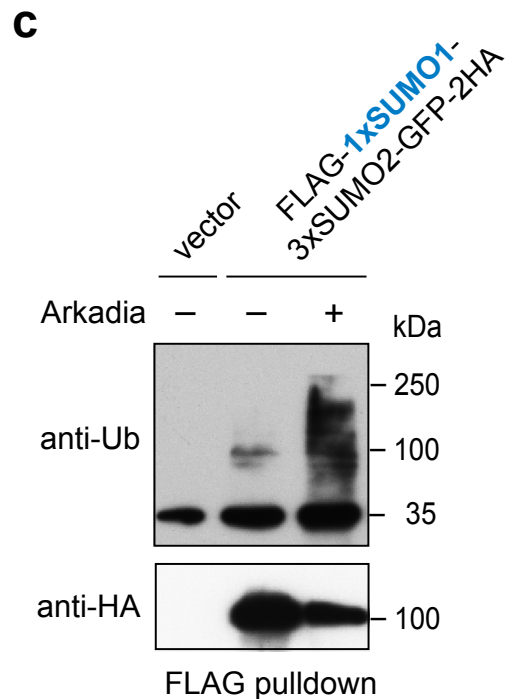

**Supplementary figure 2. Arkadia promotes ubiquitylation and degradation of substrates with SUMO1-capped SUMO2 chains by the proteasome. (Legend on next page).**

## Supplementary Fig. 2

**Arkadia promotes ubiquitylation and degradation of substrates with SUMO1-capped SUMO2 chains by the proteasome.** **a** Pulse chase analysis of cells co-expressing the indicated GFP substrate fused to a linear SUMO1-capped 3xSUMO2 chain either with an empty vector or with Arkadia. Two exponential cultures were split. One half was used to perform the pulse chase experiment in the absence, and the other half in the presence of 20  $\mu$ M MG132. An arrow indicates the position of the unmodified GFP substrate. An arrowhead points to an accumulation of high-molecular weight, likely ubiquitylated forms of the substrate detectable in higher amounts upon co-expression of Arkadia and after MG132 treatment. Below the autoradiography, the results from a phosphor-Imager quantification of the signals are plotted. **b** Analysis of levels of SUMO1-3xSUMO2-GFP substrate either in wild-type yeast cells or its *slx5 $\Delta$  uls1 $\Delta$*  mutant derivative lacking the two known yeast ULS/STUbL enzymes by quantitative Western blotting was carried out as described in the legend to Figure 1C. Bars represent the means of data obtained with independent transformants (n=4). Standard deviations (SD) are indicated by error bars. Asterisks indicate significant differences with p-values < 0.1. Statistical significance was determined with unpaired and two-sided Student's t-tests. **c** Arkadia promotes the ubiquitylation of a GFP-substrate carrying a SUMO1-capped 3xSUMO2 chain. An N-terminally FLAG-tagged variant of the substrate was co-expressed either with an empty vector or with Arkadia. Extracts were prepared under denaturing conditions followed by a pulldown using an anti-FLAG antibody resin. Bound material was analysed by anti-HA Western blotting to detect the amount of recovered GFP-HA substrate, and by anti-ubiquitin blotting to detect ubiquitylated forms of the substrate. Note the much higher level of ubiquitylated forms of the substrate upon co-expression of Arkadia despite a lower steady state level of the substrate due to Arkadia-mediated degradation. Source data for **a**, **b**, and **c** are provided as a Source Data file.

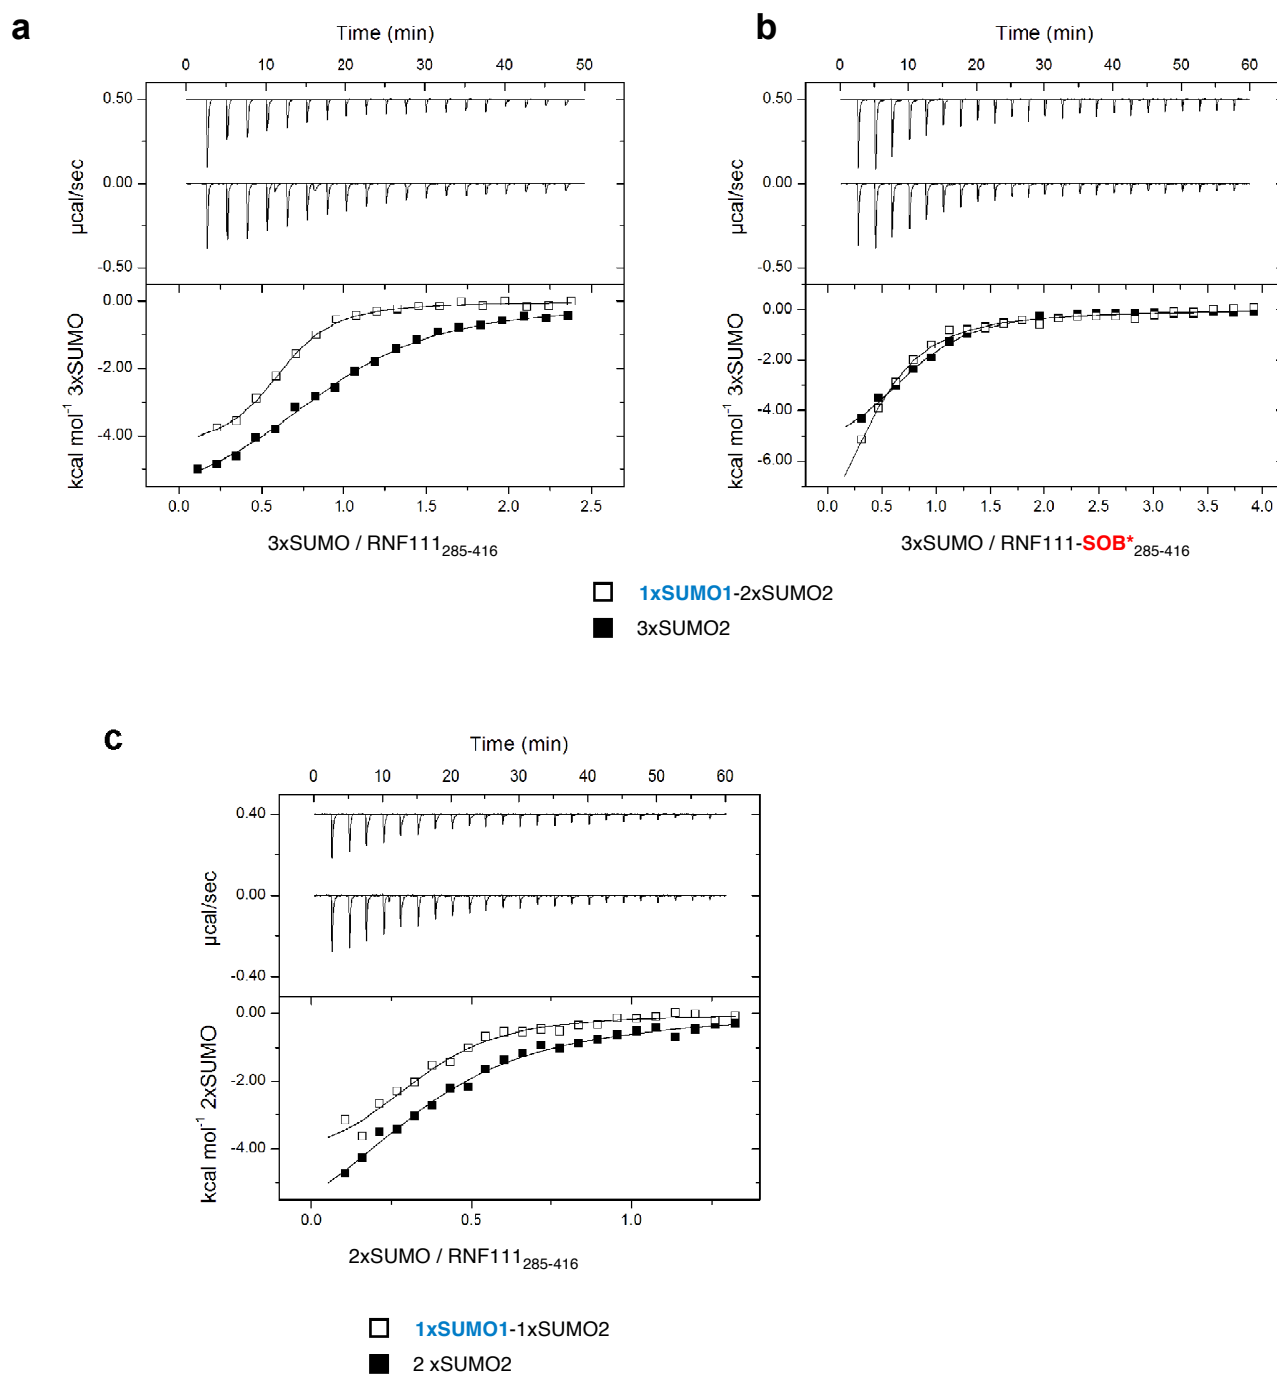

### Supplementary Fig. 3

**Affinity of the Arkadia SUMO-binding domain to SUMO chains measured by isothermal titration calorimetry.** **a** Calorimetric titration of the Arkadia SUMO-binding domain with trimeric linear SUMO chains. Shown are the profiles of typical titrations of the indicated trimeric SUMO chains into a solution of Arkadia<sub>285-416</sub> (upper panel, top to bottom) and the integrated data, normalized to the concentration of the SUMOs (lower panel). **b** Same as in **a**, but with the SOB\* mutant version (see Figure 2a) of the Arkadia SUMO-binding domain. **c** Same as in **a** but with dimeric SUMO chains.

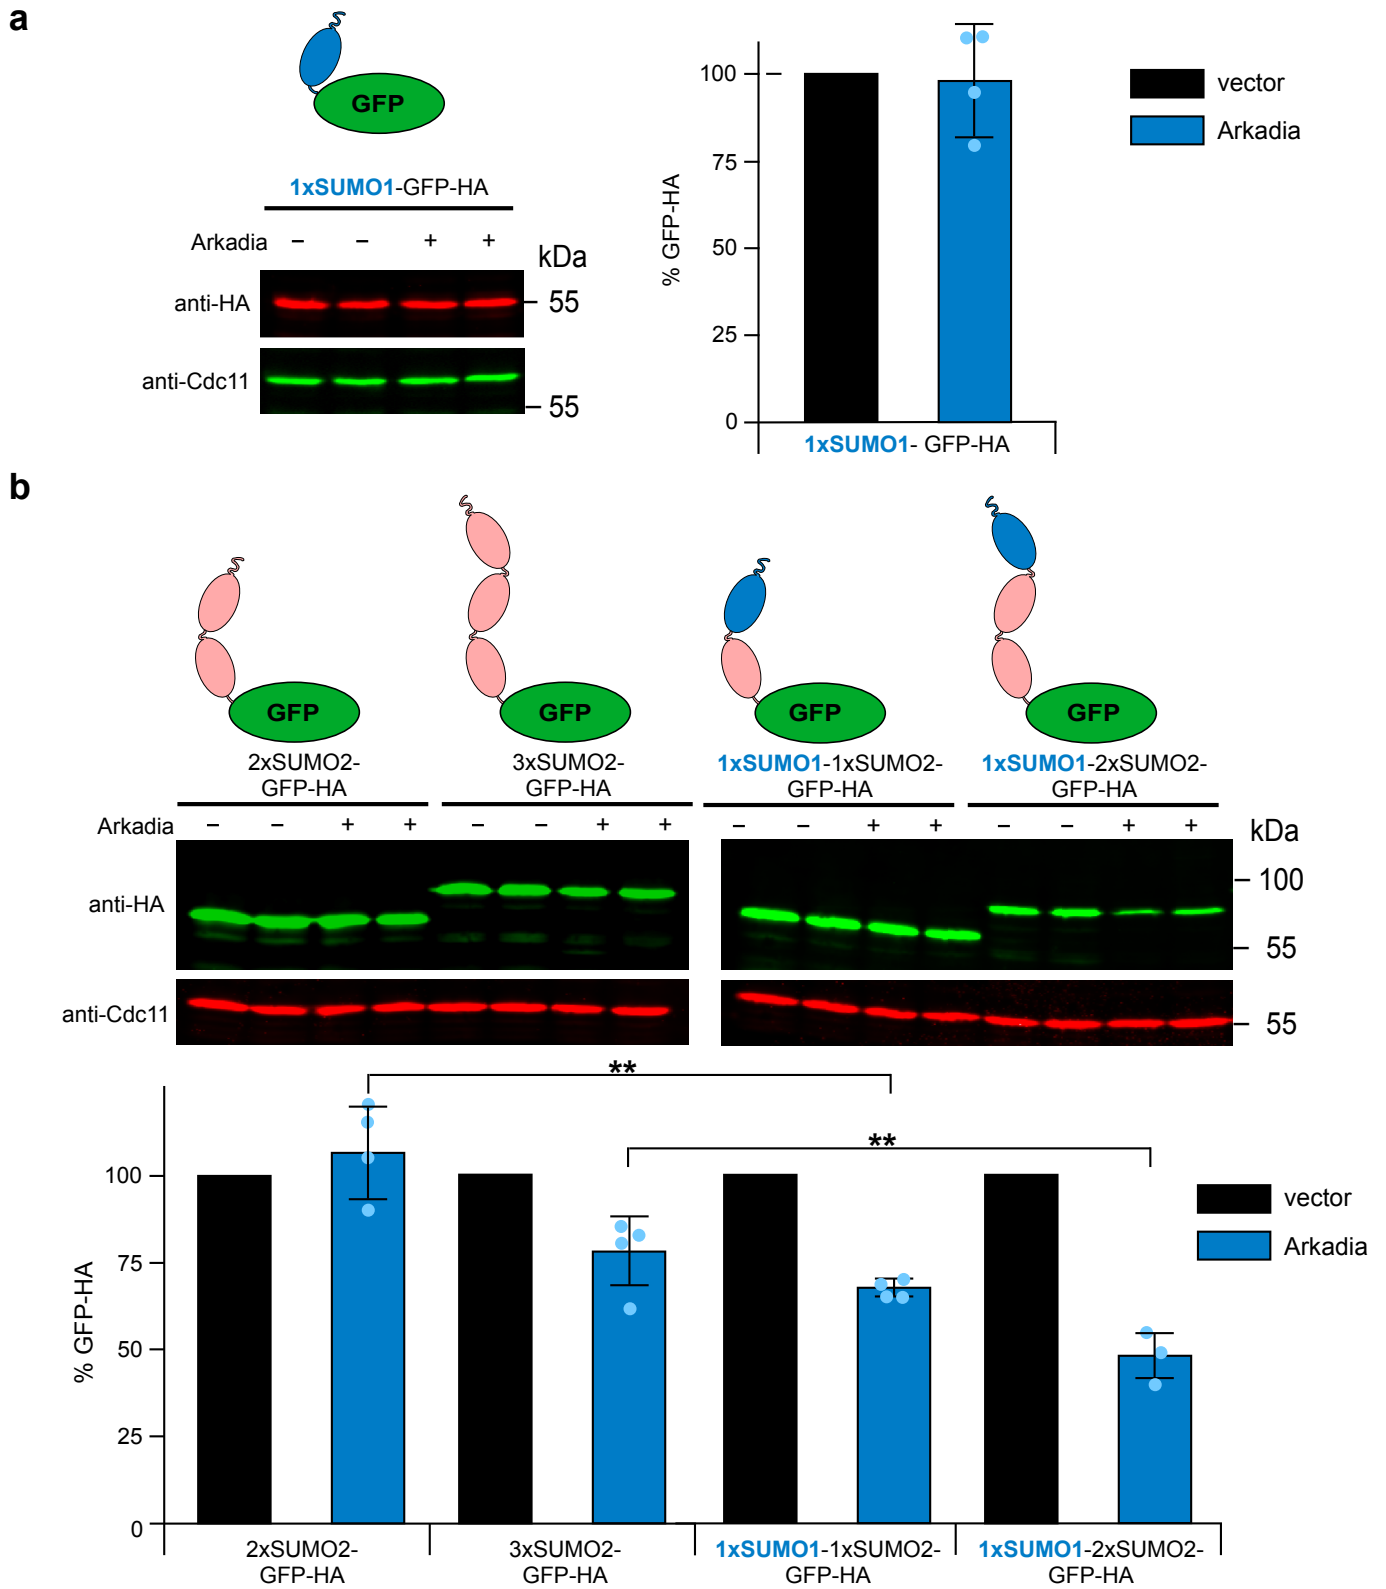

**Supplementary Fig 4**

**SUMO chain type and length preference of Arkadia.** (legend on next page)

#### Supplementary Fig. 4

**SUMO chain type and length preference of Arkadia.** **a** Quantitative Western blot analysis showing that Arkadia does not target a SUMO1-GFP test protein upon co-expression in yeast cells. **b** Quantitative Western blot analyses addressing the chain length preference of Arkadia with substrates carrying either homogeneous SUMO2 chains (left panel) or SUMO1-capped SUMO2 chains (right panel). Arkadia does not target a 2xSUMO2-GFP test protein upon expression in yeast cells, and only weakly targets a 3xSUMO2-GFP variant of the substrate (left panel). In contrast, significant targeting of SUMO1-SUMO2-GFP is already detectable, and targeting efficiency increases with chain length. Western blot analysis for **a** and **b** was carried out as described in the legend to Figure 1c. Bars represent the means of data obtained with independent transformants (n=4). Standard deviations (SD) are indicated by error bars. Two asterisks indicate significant differences with p-values < 0.01. Statistical significance was determined with unpaired and two-sided Student's t-tests. Source data for **a** and **b** are provided as a Source Data file.

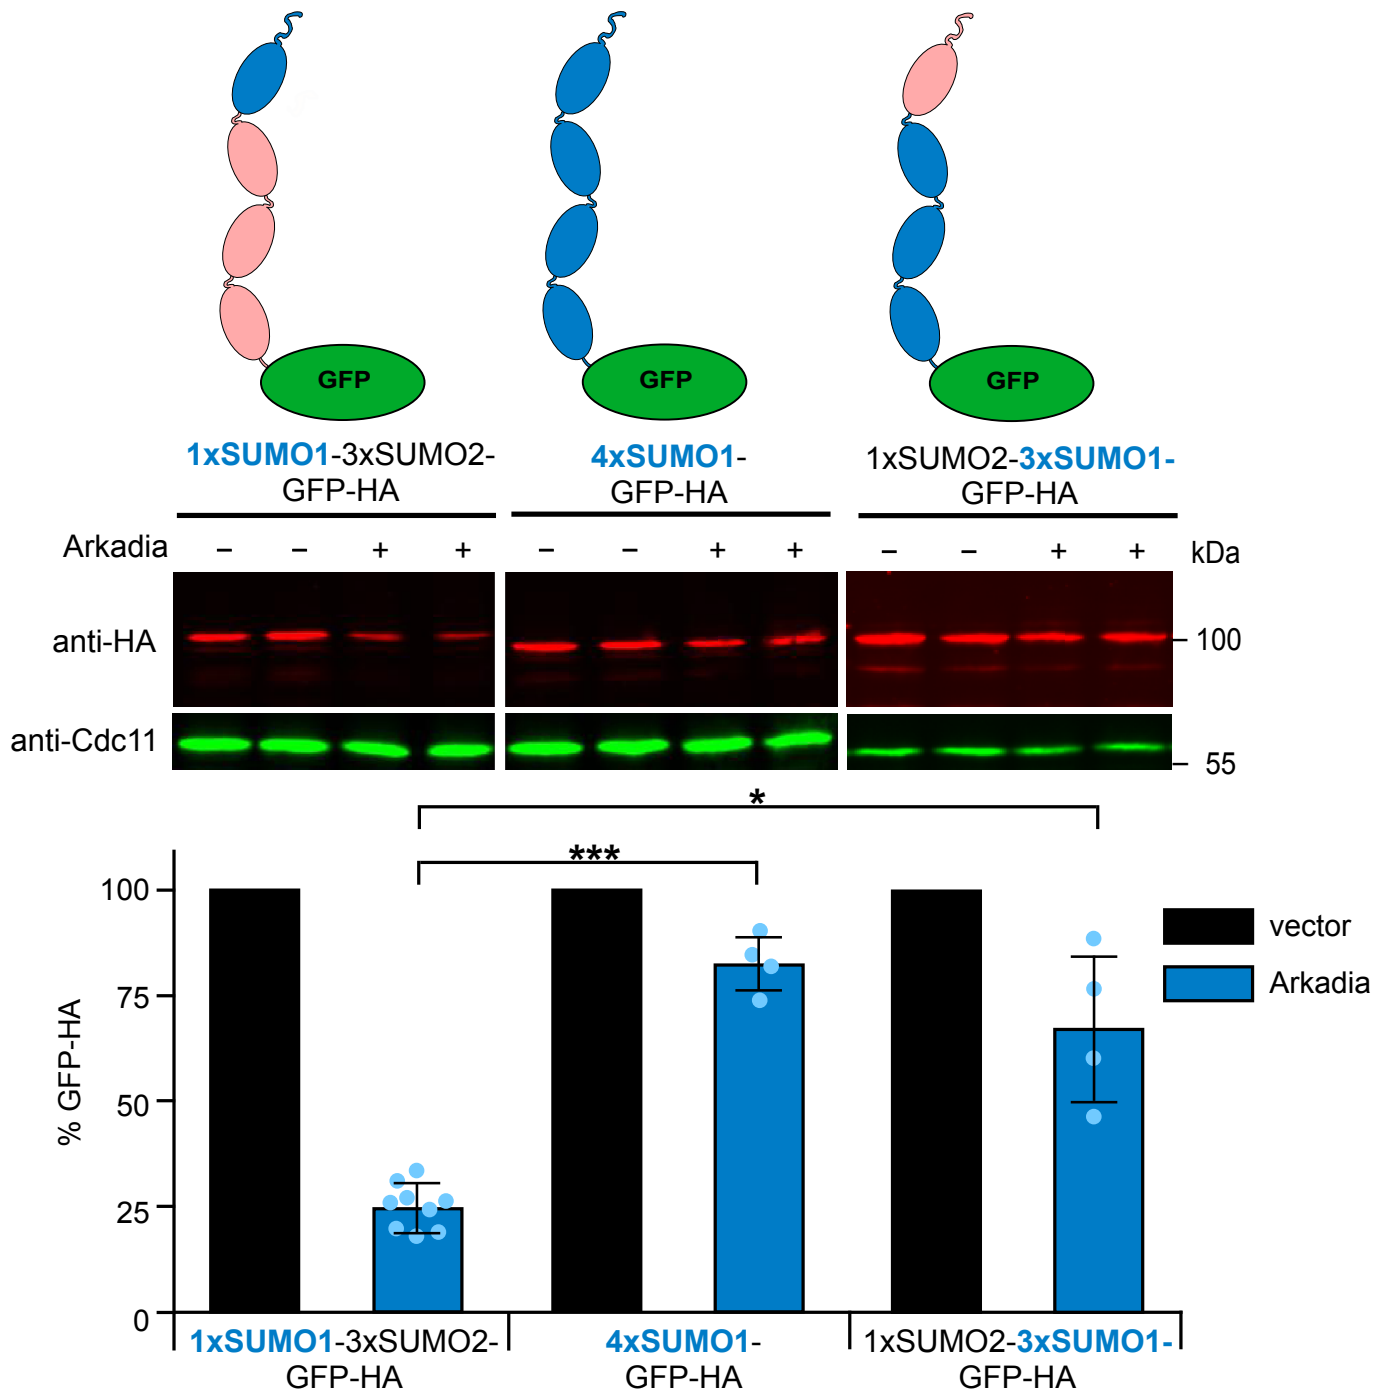

**Supplementary Fig. 5** (legend on next page)



### Supplementary Fig. 5

**Arkadia has a preference for SUMO1-capped SUMO2 chains.** Shown is a comparative analysis of targeting efficiency of GFP-HA substrates carrying distinct linear tetra-SUMO chains upon co-expression of Arkadia in *S. cerevisiae*. Levels of each indicated data point for the distinct 4xSUMO-HA substrates were determined with independent transformants by quantitative anti-HA Western blotting as described in the legend to Figure 1c. Data for 1xSUMO1-3xSUMO2-GFP-HA are the same as the ones shown in Figure 1c (n=9). For 4xSUMO1-GFP-HA and 1xSUMO2-3xSUMO1-GFP-HA, n=4. Bars represent the means of data obtained with independent transformants. Standard deviations (SD) are indicated by error bars. An asterisk indicates significant differences with p-values < 0.02, three asterisks: p < 0.001. Statistical significance was determined with unpaired and two-sided Student's t-tests. Source data are provided as a Source Data file.

**A**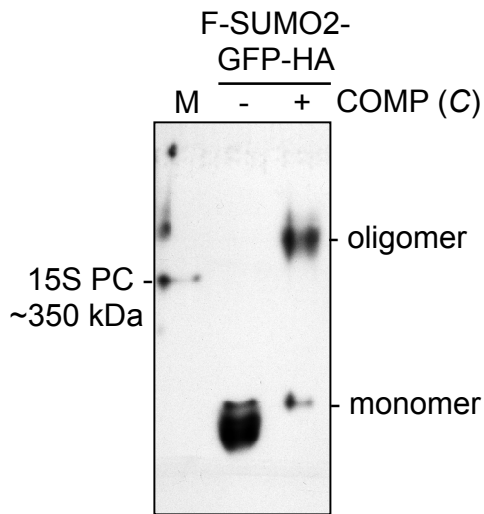**B**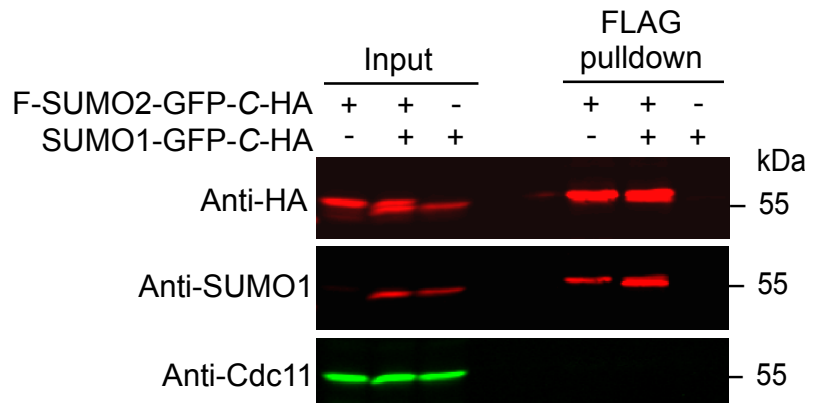**C**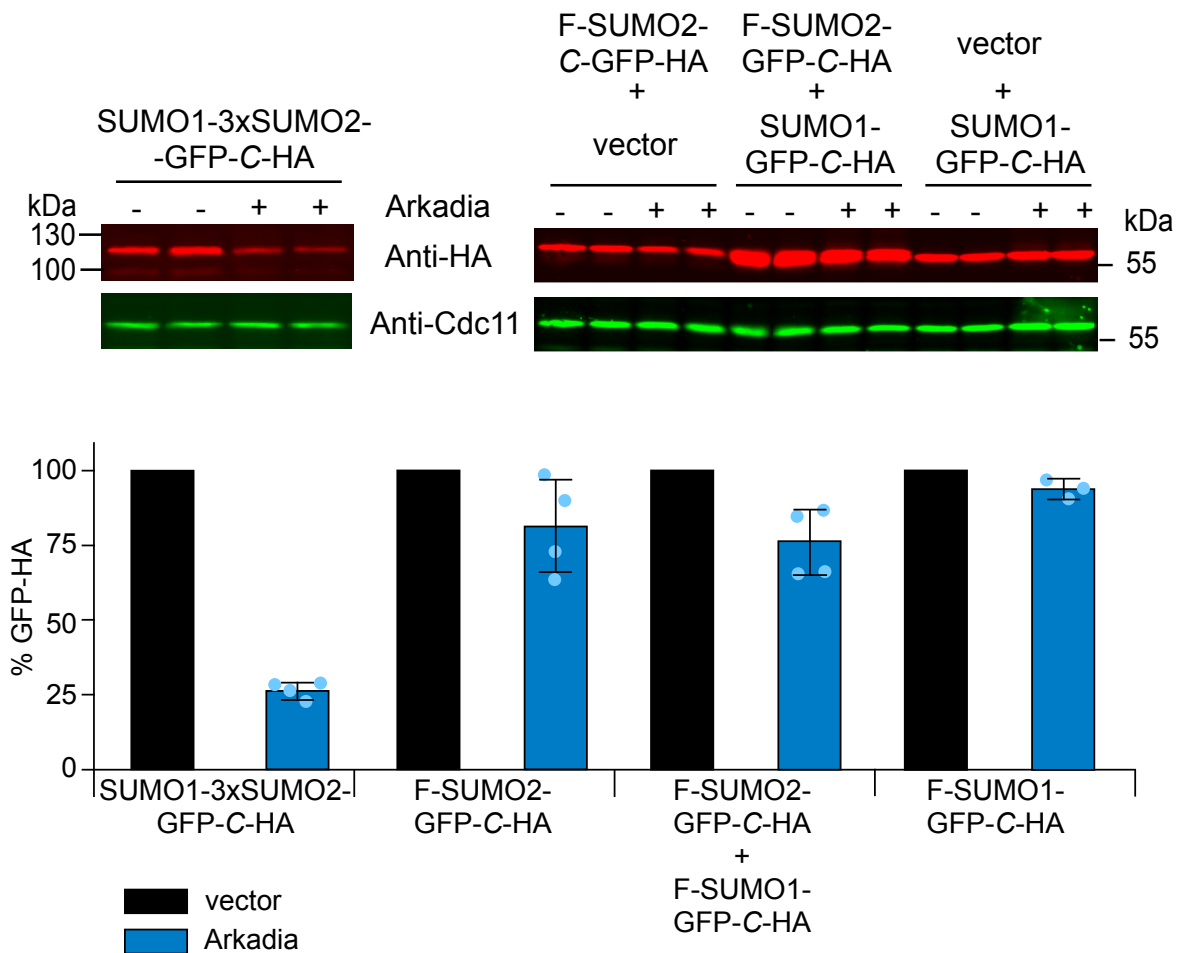

**Supplementary figure 6. Arkadia does not efficiently target oligomeric GFP-HA substrates presenting multiple mono-SUMO1 or mono-SUMO2 fusions or combinations of the two (Legend on next page).**

### Supplementary Fig. 6

**Arkadia does not efficiently target oligomeric GFP-HA substrates presenting multiple mono-SUMO1 or mono-SUMO2 fusions or combinations of the two.**

**a** SUMO2 forms an oligomer when fused to a COMP domain. Shown is a native gel analysis of extracts from yeast cells expressing FLAG- SUMO2- GFP-HA either with (+) or without (-) a pentamerization domain of mouse cartilage oligomeric matrix protein COMP (C) inserted between GFP and HA. Positions of the monomeric and oligomeric forms are indicated. The 15S proteasome precursor complex with a mass of ~350 KDa is run on the same gel for size comparison <sup>1</sup>. **b** Anti- FLAG pulldown experiment with yeast extracts showing that F-SUMO2-GFP-C-HA co-precipitates and thus forms hetero-oligomeric complexes with SUMO1-GFP-C-HA. Cells were grown to log phase and protein extracts and FLAG immunoprecipitations were performed under native conditions. Input and eluate samples were analyzed by anti-HA and anti-Cdc11 western blotting. Endogenous Cdc11 protein levels were detected as a loading control. **c** Cells expressing either SUMO1-3xSUMO2-GFP-C-HA (left panel), FLAG- SUMO2-GFP-C-HA or SUMO1-GFP-C-HA, or the latter two together (right panel), were transformed either with an empty vector or a plasmid expressing Arkadia. Cells were grown to log phase and protein crude extracts were prepared and analysed by quantitative western blotting. Bars represent the means of data obtained with independent transformants (n=3 or 4). Standard deviations (SD) are indicated by error bars. Source data for **a**, **b**, and **c** are provided as a Source Data file.

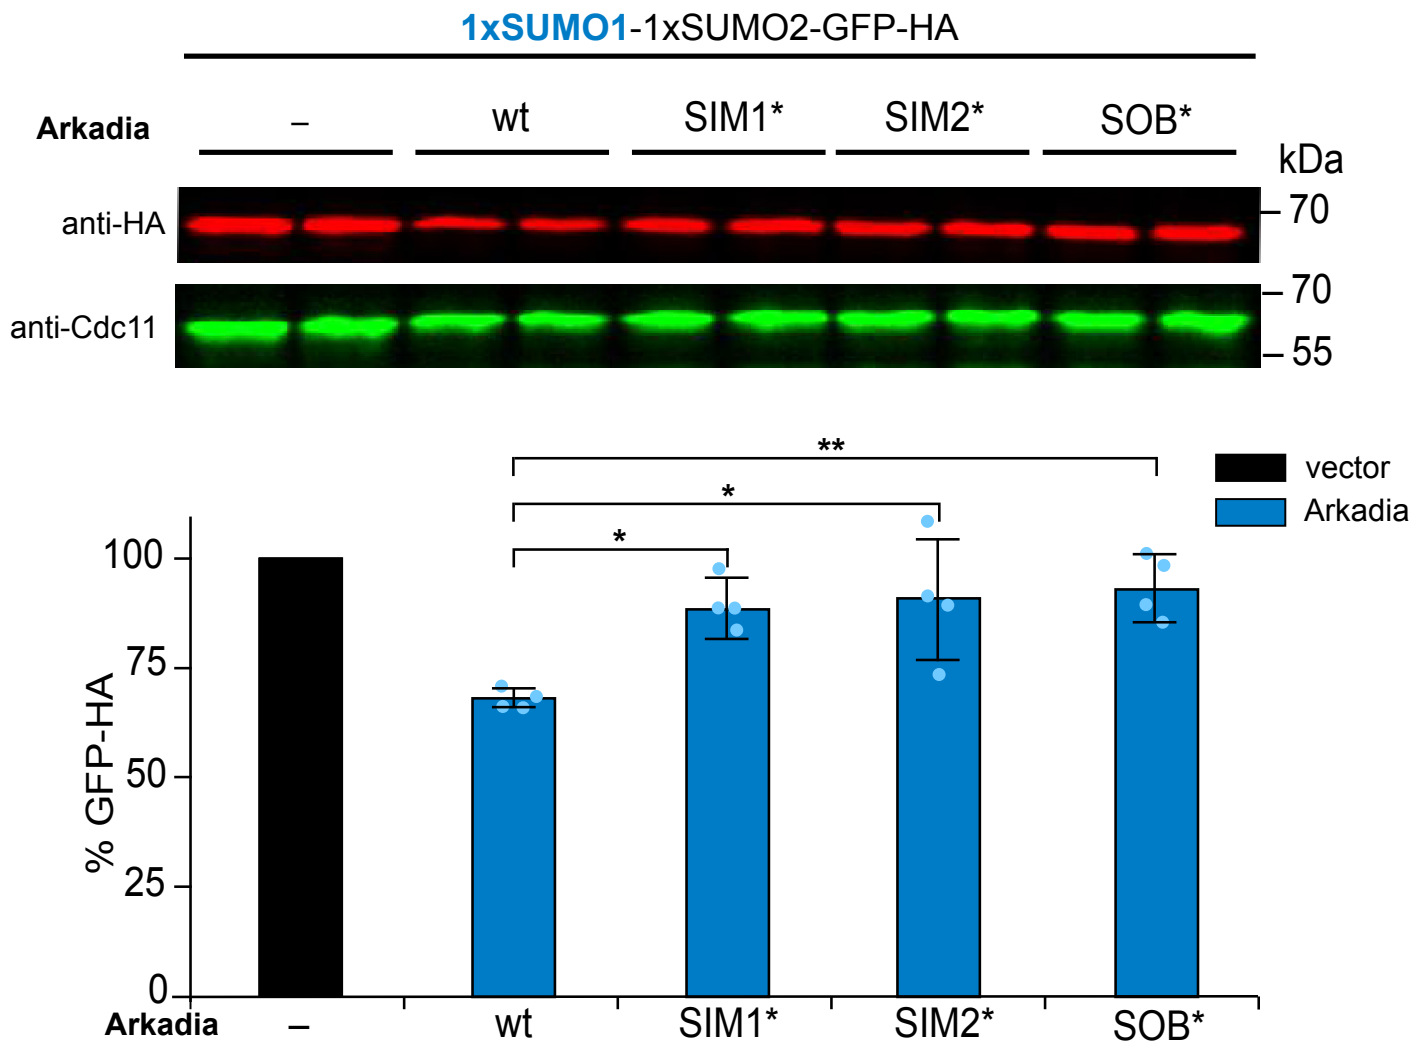

**Supplementary Fig. 7**

**Arkadia's SIM1, SIM2 and SOB motifs all contribute to the targeting of a substrate tagged with a dimeric SUMO1-SUMO2 chain.** Shown is comparative analysis of targeting efficiencies of GFP-HA substrate carrying a dimeric SUMO1-SUMO2 chain by wild-type Arkadia, its SOB (SOB\*), or SIM (SIM1\* or SIM2\*) mutant derivatives upon their co-expression in yeast cells. SOB\* and SIM\* mutations were the same as shown in Fig. 2 and Fig. 3, respectively. Levels of the SUMO1-SUMO2-GFP-HA substrate were determined by quantitative anti-HA Western blotting as described in the legend to Figure 1c. Bars represent the means of data obtained with independent transformants (n=4). Standard deviations (SD) are indicated by error bars. An asterisk indicates significant differences with p-values < 0.1, two asterisks differences with p-values < 0.01. Statistical significance was determined with unpaired and two-sided Student's t-tests. Source data are provided as a Source Data file.

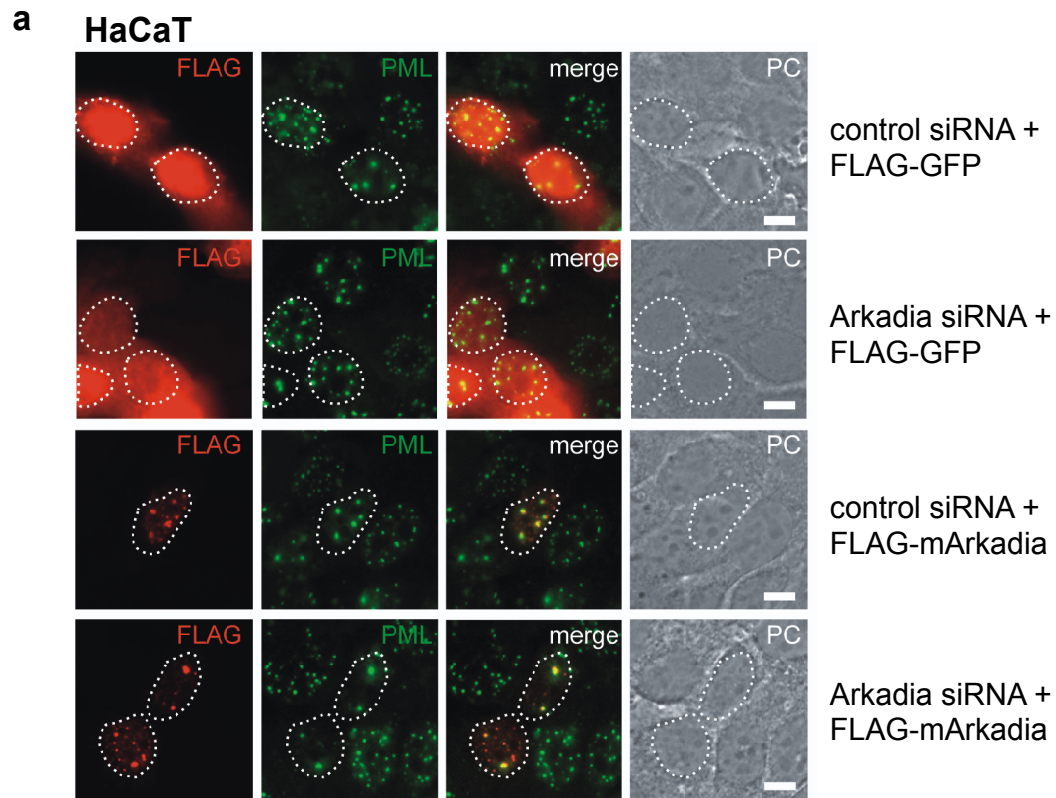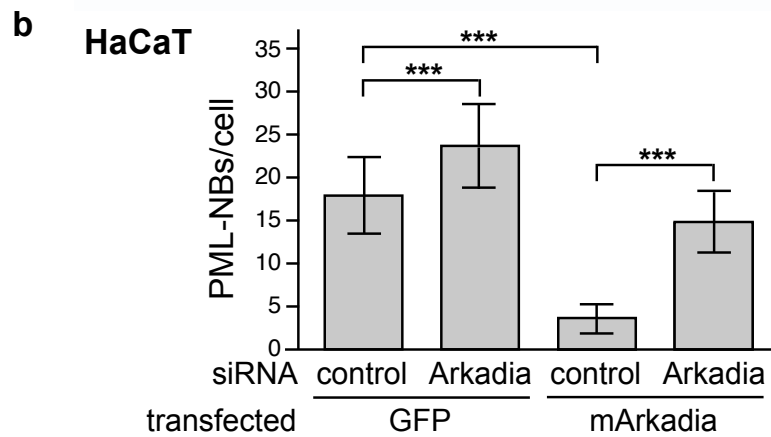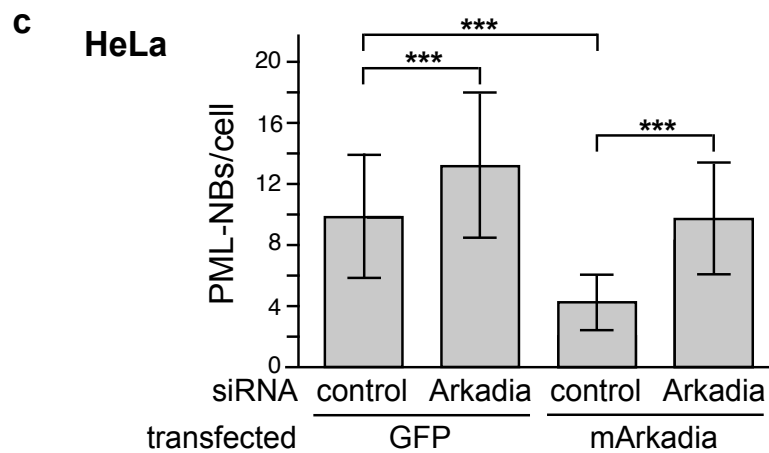

**Supplementary Fig. 8. Knockdown experiments show that endogenous Arkadia contributes to the regulation of PML nuclear bodies.** (Legend on the following page).

## Supplementary Fig. 8

**Knockdown experiments show that endogenous Arkadia contributes to the regulation of PML nuclear bodies.** **a** HaCaT cells were co-transfected with plasmids expressing either FLAG-GFP, wild-type (wt) mouse FLAG-Arkadia and either a control siRNA or an siRNA directed against endogenous human Arkadia. Cells were fixed and co-stained using mouse anti-FLAG and rabbit anti-PML antibodies. Nuclei of transfected cells positive for FLAG staining are highlighted by dashed lines. Scale bar, 10  $\mu$ m. **b** Quantitative analyses of the number of PML-NBs in at least 20 cells from each of the samples shown in **a** (upper part), or **c** from at least 55 cells each of identically treated samples of HeLa cells (no images shown). Bars represent the means. Standard deviations (SD) are indicated by error bars. Three asterisks indicate significant differences with p-values < 0.001. Statistical significance was determined with unpaired and two-sided Student's t-tests. Source data for **b** and **c** are provided as a Source Data file.

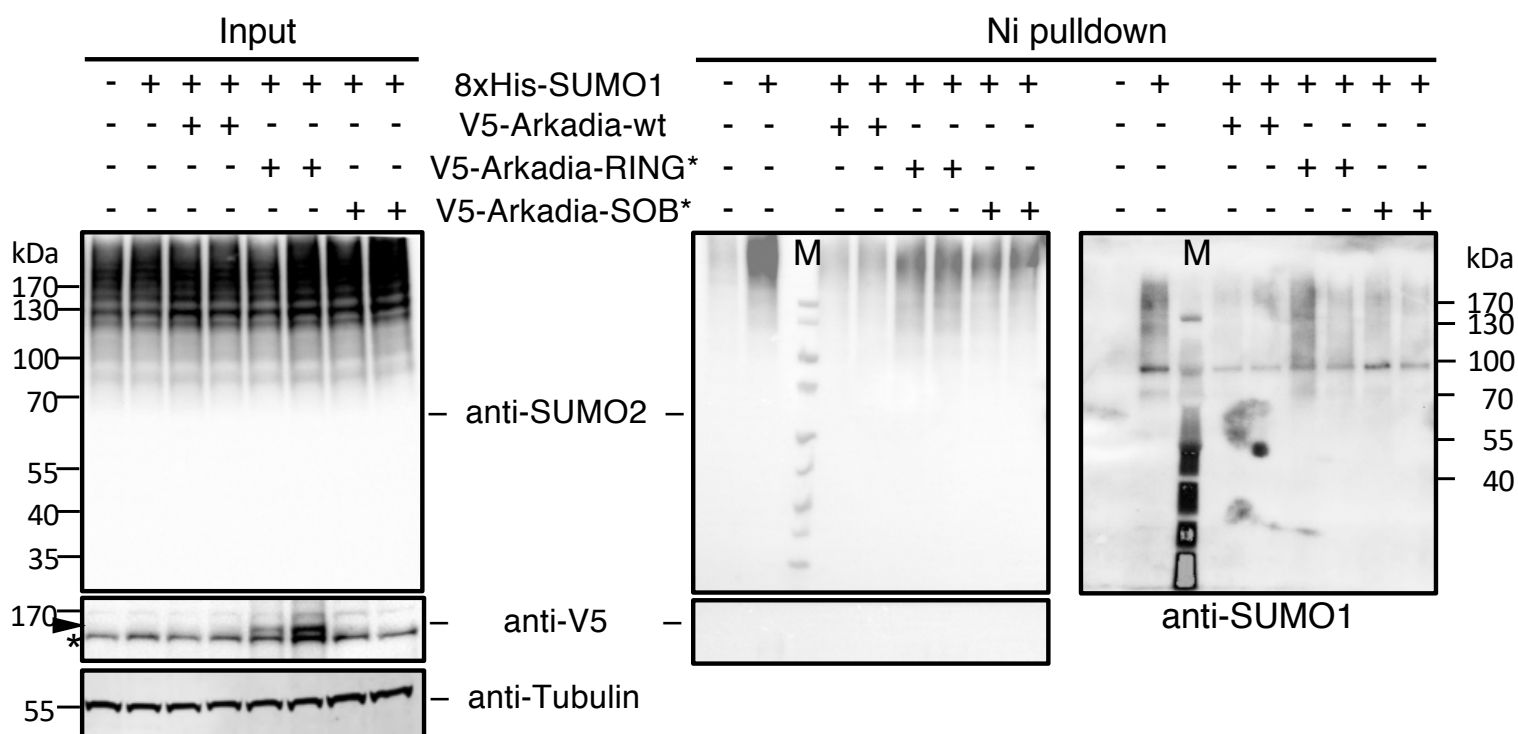

**Supplementary Fig. 9**

**Expression of Arkadia reduces the levels of SUMO1-capped SUMO2 conjugates in human 293T cells in a RING- and SOB-dependent manner.** Stable transfectants expressing 8xHis-SUMO1 and as a cleavable linear fusion with either V5-Arkadia (wt), or its RING (RING\*) or SOB (SOB\*) mutants, or no Arkadia (samples each), were lysed under denaturing conditions (8 M urea). Extracts samples (Input) were analysed with anti-SUMO2, anti-V5, and anti-tubulin antibodies (left panels). An arrowhead marks the position of V5-Arkadia-RING\*, which is detected in higher amounts than its wild-type or SOB\* counterparts indicating that this ligases mediates its own downregulation. Extracts were subjected to Ni-NTA pulldown. Eluted proteins were analyzed with SUMO2, SUMO1, and V5 antibodies (right panels). Note that expression as a cleavable fusion to Arkadia reduces the expression level of 8xHis-SUMO1 as compared to a cell line just expressing mature 8His-SUMO1 likely due to differences in mRNA stability or translation. M, size marker. Source data are provided as a Source Data file.

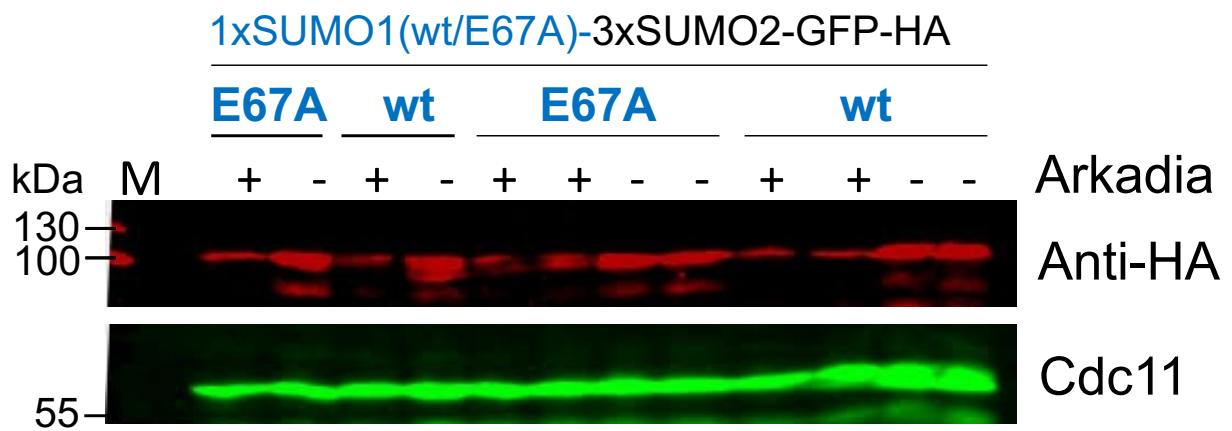

### Supplementary Fig. 10

**SUMO1-E67A mutation does not interfere with recognition by Arkadia.** Analysis of levels of SUMO1-3xSUMO2-GFP substrate either with wild-type SUMO1 (wt) or its E67A mutant version in wild-type yeast cells transformed either with empty vector (-) or a plasmid expressing Arkadia (+). Proteins from four independent transformants were analysed by western blotting with anti-HA and Cdc11 antibodies (loading control). Source data are provided as a Source Data file.



**Supplementary Table 1: Plasmids used in this study**

| <b>Plasmid Name</b> | <b>Description</b>                                                                               | <b>vector</b>                                |
|---------------------|--------------------------------------------------------------------------------------------------|----------------------------------------------|
| pAS12               | <i>P<sub>CUP1</sub>-FLAG-6xHis-1xSUMO1-GFP-2xHA-T<sub>CYC1</sub></i>                             | YCplac22 <sup>2</sup><br>( <i>CEN/TRP1</i> ) |
| pAS17               | <i>P<sub>CUP1</sub>-FLAG-6xHis-2xSUMO2-GFP-2xHA-T<sub>CYC1</sub></i>                             | YCplac22                                     |
| pAS18               | <i>P<sub>CUP1</sub>-FLAG-6xHis-3xSUMO2-GFP-2xHA-T<sub>CYC1</sub></i>                             | YCplac22                                     |
| pAS19               | <i>P<sub>CUP1</sub>-FLAG-6xHis-4xSUMO2-GFP-2xHA-T<sub>CYC1</sub></i>                             | YCplac22                                     |
| pAS20               | <i>P<sub>CUP1</sub>-FLAG-6xHis-1xSUMO1-1xSUMO2-GFP-2xHA-T<sub>CYC1</sub></i>                     | YCplac22                                     |
| pAS21               | <i>P<sub>CUP1</sub>-FLAG-6xHis-1xSUMO1-2xSUMO2-GFP-2xHA-T<sub>CYC1</sub></i>                     | YCplac22                                     |
| pAS22               | <i>P<sub>CUP1</sub>-FLAG-6xHis-1xSUMO1-3xSUMO2-GFP-2xHA-T<sub>CYC1</sub></i>                     | YCplac22                                     |
| pAS69               | <i>P<sub>CUP1</sub>-3xSUMO2-GFP-2xHA-T<sub>CYC1</sub></i>                                        | YCplac22                                     |
| pAS73               | <i>P<sub>CUP1</sub>-1xSUMO1-3xSUMO2-GFP-2xHA-T<sub>CYC1</sub></i>                                | YCplac22                                     |
| pAS137              | <i>P<sub>CUP1</sub>-1xSUMO2(D71H)-2xSUMO2-GFP-2xHA-T<sub>CYC1</sub></i>                          | YCplac22                                     |
| pAS141              | <i>P<sub>CUP1</sub>-1xSUMO1(H75D)-3xSUMO2-GFP-2xHA-T<sub>CYC1</sub></i>                          | YCplac22                                     |
| pKG87 <sup>3</sup>  | <i>P<sub>CUP1</sub>-RNF4-T<sub>CYC1</sub></i>                                                    | YEplac181 <sup>2</sup><br>( <i>2μ/LEU2</i> ) |
| pAS23               | <i>P<sub>CUP1</sub>-Arkadia-T<sub>CYC1</sub></i>                                                 | YEplac181                                    |
| pAS40               | <i>P<sub>CUP1</sub>-Arkadia(SIM1*)-T<sub>CYC1</sub></i>                                          | YEplac181                                    |
| pAS41               | <i>P<sub>CUP1</sub>-Arkadia(SIM2*)-T<sub>CYC1</sub></i>                                          | YEplac181                                    |
| pAS153              | <i>P<sub>CUP1</sub>-Arkadia(SOB*)-T<sub>CYC1</sub></i>                                           | YEplac181                                    |
| pAS160              | <i>P<sub>CUP1</sub>-4xSUMO1-2xHA-T<sub>CYC1</sub></i>                                            | YCplac22                                     |
| pAS162              | <i>P<sub>CUP1</sub>-1xSUMO2-3xSUMO1-GFP-2xHA-T<sub>CYC1</sub></i>                                | YCplac22                                     |
| pJD662              | <i>P<sub>CUP1</sub>-FLAG-6xHis-1xSUMO2-Pent<sub>COMP</sub>-GFP-2xHA-T<sub>CYC1</sub></i>         | YCplac22                                     |
| pJD664              | <i>P<sub>CUP1</sub>-FLAG-6xHis-1xSUMO1-3xSUMO2-Pent<sub>COMP</sub>-GFP-2xHA-T<sub>CYC1</sub></i> | YCplac22                                     |
| pJD665              | <i>P<sub>CUP1</sub>-1xSUMO1-Pent<sub>COMP</sub>-GFP-2xHA-T<sub>CYC1</sub></i>                    | YCplac33 <sup>2</sup><br>( <i>CEN/URA3</i> ) |
| pJD667              | <i>P<sub>CUP1</sub>-RNF4-GFP-T<sub>CYC1</sub></i>                                                | YEplac181                                    |

|                                                              |                                                                                            |                                                   |
|--------------------------------------------------------------|--------------------------------------------------------------------------------------------|---------------------------------------------------|
| pJD668                                                       | <i>P<sub>CUP1</sub>-Arkadia-GFP-T<sub>CYC1</sub></i>                                       | YEplac181                                         |
| pGEX-TN-mArkadia(285-416)                                    | <i>P<sub>tac</sub>-GST-TEV-Arkadia(M.m.)(285-416)</i>                                      | pGEX-4T-2;<br>TEV after of<br>thrombin            |
| pGEX-TN-mArkadia(285-416)<br>-SOB*                           | <i>P<sub>tac</sub> - GST-TEV-TN-Arkadia(M.m.)(285-416)<br/>-SOB*</i>                       | pGEX-4T-2;<br>TEV after of<br>thrombin            |
| pGEX-4T-2-2xSUMO2( $\Delta$ N11) <sup>4</sup>                | <i>P<sub>tac</sub>-GST-2xSUMO2(<math>\Delta</math>N11)</i>                                 | pGEX-4T-2<br>GE Healthcare                        |
| pGEX-4T-2-3xSUMO2( $\Delta$ N11) <sup>4</sup>                | <i>P<sub>tac</sub>-GST-3xSUMO2(<math>\Delta</math>N11)</i>                                 | pGEX-4T-2 (Sigma)                                 |
| pGEX-TN-1xSUMO1( $\Delta$ N15)-<br>1xSUMO2( $\Delta$ N11)    | <i>P<sub>tac</sub>-GST-1xSUMO1(<math>\Delta</math>N15)-1xSUMO2(<math>\Delta</math>N11)</i> | pGEX-4T-2;<br>TEV instead of<br>thrombin          |
| pGEX-TN-1xSUMO1( $\Delta$ N15)-<br>2xSUMO2( $\Delta$ N11)    | <i>P<sub>tac</sub>-GST-1xSUMO1(<math>\Delta</math>N15)-2xSUMO2(<math>\Delta</math>N11)</i> | pGEX-4T-2;<br>TEV instead of<br>thrombin          |
| pEGFP-C1-FLAG                                                | <i>P<sub>CMV</sub>-EGFP-FLAG</i>                                                           | pEGFP-C1<br>(Clontech)                            |
| pCDEF3-FLAG-mRNF111 <sup>5</sup><br>provided by Masao Saitoh | <i>P<sub>CMV</sub>-FLAG-Arkadia (M.m.),</i>                                                | <i>pCDNA3</i>                                     |
| pCDNA-HA-hRNF111                                             | <i>pCDNA4-HA-hRNF111 (wt)</i>                                                              | <i>pCDNA4/TO</i><br>(Thermo Fisher<br>Scientific) |
| pCDNA-HA-hRNF111                                             | <i>pCDNA4-HA-hRNF111-SOB*</i>                                                              | <i>pCDNA4/TO</i>                                  |
| pcDNA5-8His-SUMO1                                            | <i>pcDNA5/FRT/TO-8His-SUMO-P2AV5</i>                                                       | pcDNA5/FRT/TO<br>(Thermo Fisher<br>Scientific)    |
| pcDNA5-8His-SUMO1-<br>V5-Arkadia-wt                          | <i>pcDNA5/FRT/TO-8His-SUMO-P2AV5-hArkadia<br/>wt</i>                                       | pcDNA5/FRT/TO                                     |
| pcDNA5-8His-SUMO1-<br>V5-Arkadia-RING*                       | <i>pcDNA5/FRT/TO-8His-SUMO-P2AV5-hArkadia<br/>RING*</i>                                    | pcDNA5/FRT/TO                                     |
| pcDNA5-8His-SUMO1-<br>V5-Arkadia-SOB*                        | <i>pcDNA5/FRT/TO-8His-SUMO-P2AV5-hArkadia<br/>SOB*</i>                                     | pcDNA5/FRT/TO                                     |

**Supplementary Table 2: Oligonucleotides used in this study**

| Name   | Sequence 5' – 3'                                                         | Description                |
|--------|--------------------------------------------------------------------------|----------------------------|
| AS3856 | A <u>A</u> CTGCAGATGAGTAAAGGAGAAGA <u>A</u> ACTTTTCAC                    | FP PstI GFP                |
| JD1942 | CGCGGTACCTTTGTATAGTTCATCCATGCCATG                                        | RP KpnI GFP                |
| JD168  | CGCGGTACCTGGGAATGAGTAAAGGAGAAGAAC                                        | FP KpnI GFP                |
| JD167  | CGCTCTAGATTTATTTGTATAGTTCATC                                             | RP XbaI GFP                |
| JD4762 | CGCGGATCCATGACAAGAAAGCGTCGTGGTGGAGC                                      | FP BamHI RNF4              |
| JD4763 | CGCGGTACCCTATATAAATGGGGTGATACCGTTTGTGGTTGATCTTTTTCC                      | RP KpnI RNF4               |
| AS3748 | CGCGGTACCCACTTTCACTTGGCAGCTGGGCCTC                                       | RP KpnI hArkadia           |
| AS3747 | GCCAGTGGACCTGAGCAACAGTGG                                                 | FP Arkadia (internal)      |
| JD3814 | GAAGACACAGAGGAAAAATGTACGATATCTTTGTCTATTTTAGAGGAAGG                       | FP hArkadia (RING*)        |
| JD3815 | CCTTCTCTAAAATAGACAAAGATATCGTACATTTTTCTCTGTGTCTTC                         | RP hArkadia (RING*)        |
| JD3857 | GCGGGATCCATGCATCACCATCACCATCACGCCATGGCCGACGAAAAGCCCAAGGAAGG              | FP BamHI 6xHis-SUMO2       |
| JD3858 | CGCGCTGCAGTCCCGTCTGCTGTTGGAACACATCAA                                     | RP PstI SUMO2              |
| JD3859 | CGCGATGCATACTGAGAACAACGATCATATTAATTTG                                    | FP NsiI SUMO2              |
| JD3860 | GCGGGATCCATGCATCACCATCACCATCACGCCATGTCTGACCAGGAGGCAAAACCTTC              | FP BamHI 6xHis-SUMO1       |
| JD3861 | CGCGCTGCAGCCCGTTTGTCTGATAAACTTCAA                                        | RP SUMO1 PstI              |
| AS3934 | GAAGTATTGATGAAGCGGCCGCGGTGATAGAAGCTTCTCCACTCCCC                          | FP hArkadia (SIM1*)        |
| AS3935 | GCTTCTATCACCGCGCCGCTTCATCAACTTCTGAGGGAACAGCTCC                           | RP hArkadia (SIM1*)        |
| AS3936 | GCAGCAGAAGTTGCCGCGCGACCGTTGATGAAGATGAACCTACTGTAG                         | FP hArkadia (SIM2*)        |
| AS3937 | CTTCCATCAACGGTCCCGCGGCAACTTCTGCTGCATTCTGCCTC                             | RP hArkadia (SIM2*)        |
| AS4411 | CAACTGACAGTGAAGCGGAGATTGCAACAGTTGGAGAAAGCTATCGGTCTCG                     | FP hArkadia (SOB*)         |
| AS4412 | CGAGACCGATAGCTTCTCCAACCTGTTGCAATCTCCGTTCACTGTCAAGTTG                     | RP hArkadia (SOB*)         |
| ML422  | GCGGAGCTCCATTACCGACATTTGGGCG                                             | FP SacI P <sub>CUP1</sub>  |
| AS4009 | CGGGATCCAGAATTCGTTACAGTTTGTCTTTCTTAA                                     | RP BamHI P <sub>CUP1</sub> |
| AS4030 | CGGGATCCATGTCTGACCAGGAGGCAAAACCTTCAACTGAGG                               | FP BamHI SUMO1             |
| AS4031 | CGGGATCCATGGCCGACGAAAAGCCCAAGGAAGGAGTC                                   | FP BamHI-SUMO2             |
| AS4218 | GGGCAACCAATCAATGAAACAC ACACACCTGCACAGTTGGAAATGG                          | FP (D71H) SUMO2            |
| AS4219 | CCATTTCCAACCTGTGCAGGTGTGTGTGTTTCATTGATTGGTTGCC                           | RP (D71H) SUMO2            |
| AS4220 | TCACTCAGGTTTCTCTTTGCGGGTCAGAGAATTGCTGATAA                                | FP (E67A) SUMO1            |
| AS4221 | TTATCAGCAATTCTCTGACCCGCAAAGAGAAACCTGAGTGA                                | RP (E67A) SUMO1            |
| AS4325 | CAGAGAATTGCTGATAATGATACTCCAAAAGAAGCTGGG                                  | FP (H75D) SUMO1            |
| AS4326 | CCCAGTTCTTTGGAGTATCATTATCAGCAATTCTCTG                                    | RP (H75D) SUMO1            |
| JD4741 | CGCGGTACCAGGCCATGGATTTAGCTCCACAAATGCTTCGAGAACTCCAGGAGACTA                | FP KpnI-NcoI COMP          |
| JD4742 | CGCGGTACCCGCAAGCGTCACATTCATCACC                                          | RP KpnI COMP               |
| GP0746 | AAGGAAAAAAGCGGCCGCATGTCTCAATGGACTCCTGAATATAAGGAGCTCTACACC                | FP NotI hArkadia           |
| GP0747 | CCGCTCGAGTCAACTTTCACTTGGCAGCTGGGCCTCAATGTC                               | RP XhoI hArkadia           |
| GP0629 | CGGGATCCAAGAAGGAAGGTGAATATATTAACCTCAAAGTCATTGGAC                         | FP BamHI ΔN15-SUMO1        |
| GP0630 | GAAGATCTACCCCGTTTGTCTCTGATAAACTTCAATCACATC                               | RP BglII SUMO1             |
| GP0625 | CGGGATCCACTGAGAACAACGATCATATTAATTTGAAGGTGGCG                             | FP BamHI ΔN11-SUMO2        |
| GP0626 | GAAGATCTACCTCCCGTCTGCTGTTGGAACACATC                                      | RP BglII SUMO2             |
| GP0921 | CGGGATCCAGCAACCCCGCTGCTCCC                                               | FP BamHI mArkadia (int.)   |
| GP0922 | GGAATTCGGTAGATGGATTTGAATTGTTAATGGAAGC                                    | RP EcoRI mArkadia (int.)   |
| GP1001 | CGGGATCCATGTCTCAATGGACTCCTGAATTTAACGAGC                                  | FP BamHI mArkadia          |
| GP1007 | CCTCAACTGACAGTGAAGCGGAGATTGCTACAGTTGGAGAAAGC                             | FP mArkadia SOB*           |
| GP1008 | GCTTCTCCAACCTGTAGCAATCTCCGTTCACTGTCAAGTTGAGG                             | RP mArkadia SOB*           |
| JD4846 | CGCGCTTAAGACTAAGAGGTGGTATGCATCACCATCACCATCACCATC ACGCCATGTC              | FP 8His-SUMO1              |
| NG2102 | TTTTCTCGAGATGTCTCAATGGACTCCTGAATATAACGAGCTCTACACCTTAAAGTGGA              | FP XhoI hArkadia           |
| NG2103 | TTTTTTGCGGCCGCTCAACTTTCACTTGGCAGCTGGGCCT                                 | RP NotI hArkadia           |
| NG2104 | TTTTTTGCTAGCACCATGCATCACCATCACCAC                                        | FP NheI 8His               |
| NG2105 | TTTTCTCGAGGGTGTGTCCAGGCCAGCAGTGGGTTAGGGATGGGCTGCCTGCACCCCC<br>CGTTTGTTTC | RP XhoI SUMO1-V5           |

## Supplementary References

- <sup>1</sup> Ramos, P.C., Höckendorff, J., Johnson, E., Varshavsky, A., & Dohmen, R.J. Ump1p is required for maturation of the 20S proteasome, and becomes its substrate upon completion of the assembly. *Cell* 20, 489-499 (1998).
- <sup>2</sup> Gietz, R.D. & Sugino, A. New yeast-*Escherichia coli* shuttle vectors constructed with in vitro mutagenized yeast genes lacking six-base pair restriction sites. *Gene* 74, 527-534 (1988).
- <sup>3</sup> Weisshaar, S.R., Keusekotten, K., Krause, A., Horst, C., Springer, H.M., Götttsche, K., Dohmen, R.J., and Praefcke, G.J. Arsenic trioxide stimulates SUMO-2/3 modification leading to RNF4-dependent proteolytic targeting of PML. *FEBS Lett* 582, 3174-3178.
- <sup>4</sup> Keusekotten, K., Bade, V.N., Meyer-Teschendorf, K., Sriramachandran, A.M., Fischer-Schrader, K., Krause, A., Horst, C., Schwarz, G., Hofmann, K., Dohmen, R.J., & Praefcke, G.J.K. Multivalent interactions of the SUMO-interaction motifs in RING finger protein 4 determine the specificity for chains of the SUMO. *Biochem J* 457, 207-214 (2014).
- <sup>5</sup> Koinuma, D., Shinozaki, M., Komuro, A., Goto, K., Saitoh, M., Hanyu, A., Ebina, M., Nukiwa, T., Miyazawa, K., Imamura, T., & Miyazono, K. Arkadia amplifies TGF- $\beta$  superfamily signaling through degradation of Smad7. *EMBO J* 22, 6458-6470 (2003).
